# Supplementary material
Source: PubMed Central journal article supplement (PMC3918812)
Supplement: 1318690111_pnas.201318690SI.pdf [file 1318690111_pnas.201318690SI.pdf]

# Supporting Information

Lu et al. 10.1073/pnas.1318690111

## SI Materials and Methods

**Plasmid and Strain Construction.** The *Candida albicans* strains used in this study are listed in Table S1. Primer sequences are listed in Table S2. A 1.9-kb PCR product (primers 1 and 2) containing the C-terminal *SOK1* coding region and a 0.9-kb PCR product (primers 5 and 6) containing the C-terminal *CUP9* coding region were inserted into the *Bam*HI-*Mlu*I sites of pPR673 (1). These two plasmids were digested with PstI or SpeI, respectively, to target integration into their own loci to express Sok1-13Myc and Cup9-13Myc. The pMAL2-SOK1-13MYC, pMAL2-CUP9-13MYC, and pMAL2-MGT1-13MYC plasmids were constructed by amplifying *SOK1* (primers 3 and 4), *CUP9* (primers 7 and 8), and *MGT1* (primers 13 and 14) to replace *NRG1* from the pMAL2-NRG1-MYC (2) plasmid. The resulting plasmids were digested with *Asc*I to target integration into *ADE2* locus to express Sok1-13Myc, Cup9-13Myc, and Mgt1-13Myc. The *SOK1* coding sequence was amplified using primers 15 and 16. The resulting PCR product was digested with *Bam*HI and *Mlu*I and inserted into the *Bam*HI-*Mlu*I site of pPR671-SAT1 (3) to create pACT1-SOK1-13MYC. *UBR1*

was deleted based on the method described previously (4). The disruption was confirmed by PCR. *NRG1* was deleted based on *SAT1*-flipping strategy (5). Upstream (primers 9 and 10) and downstream (primers 11 and 12) sequences of *NRG1* were cloned as *Apa*I-*Xho*I and *Not*I-*Sac*II fragments, respectively, on both sides of the *SAT1* flipper cassette to obtain the plasmid pSFS2-NRG1 for *NRG1* disruption. To disrupt the endogenous copies of *NRG1* in *sok1/sok1* and *tpk2/tpk2* mutant strains, pSFS2-NRG1 was linearized using *Apa*I and *Sac*II, which was followed by two sequential rounds of transformation, selection, and recycling of the *SAT1* marker as described in the work by Reuss et al. (5).

**Quantitative PCR Expression Analysis.** Methods for RNA isolation were carried out as previously described (6); 10  $\mu$ g total RNA were DNase-treated at 37 °C for 1 h using the RNase-Free DNase Kit (Qiagen). cDNA was synthesized using the SuperScript II Reverse Transcriptase Kit (Invitrogen), and quantitative PCR was done using iQ SYBR Green Supermix (Bio-Rad).

1. Lu Y, et al. (2008) Efg1-mediated recruitment of NuA4 to promoters is required for hypha-specific Swi/Snf binding and activation in *Candida albicans*. *Mol Biol Cell* 19(10):4260–4272.
2. Lu Y, Su C, Wang A, Liu H (2011) Hyphal development in *Candida albicans* requires two temporally linked changes in promoter chromatin for initiation and maintenance. *PLoS Biol* 9(7):e1001105.
3. Lu Y, Su C, Solis NV, Filler SG, Liu H (2013) Synergistic regulation of hyphal elongation by hypoxia, CO<sub>2</sub>, and nutrient conditions controls the virulence of *Candida albicans*. *Cell Host Microbe* 14(5):499–509.
4. Wilson RB, Davis D, Mitchell AP (1999) Rapid hypothesis testing with *Candida albicans* through gene disruption with short homology regions. *J Bacteriol* 181(6):1868–1874.
5. Reuss O, Vik A, Kolter R, Morschhäuser J (2004) The SAT1 flipper, an optimized tool for gene disruption in *Candida albicans*. *Gene* 341:119–127.
6. Lane S, Birse C, Zhou S, Matson R, Liu H (2001) DNA array studies demonstrate convergent regulation of virulence factors by Cph1, Cph2, and Efg1 in *Candida albicans*. *J Biol Chem* 276(52):48988–48996.

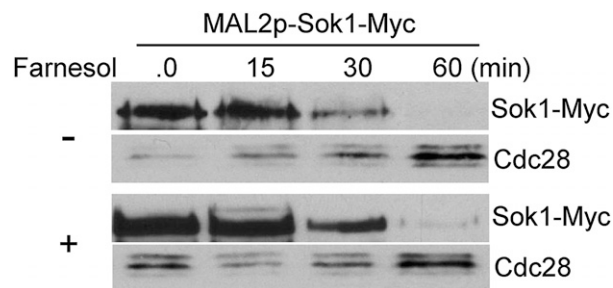

**Fig. S1.** The protein stability of Sok1 is not regulated by farnesol. Sok1 stability is monitored by *MAL2* promoter shutdown. Western blot of WT cells carrying Sok1-Myc under the *MAL2* promoter inoculated from overnight culture into fresh yeast extract peptone dextrose (YPD) medium at 30 °C with or without 100  $\mu$ M farnesol.

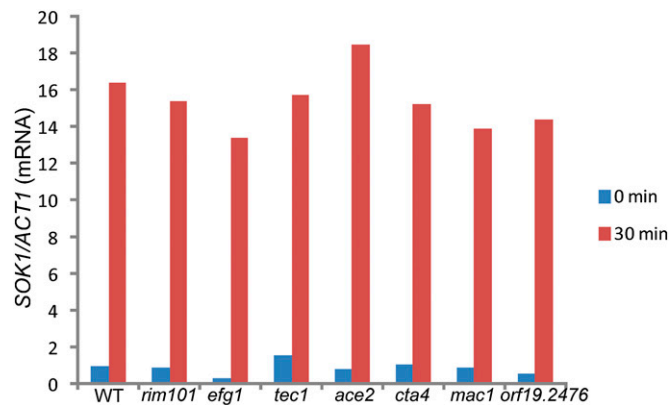

**Fig. 52.** The mutants defective in germ-tube formation show no defect in activation of *SOK1* expression. Quantitative RT-PCR analysis of *SOK1* expression in WT or indicated mutants. Cells were diluted into prewarmed YPD medium at 37 °C for 30 min. *SOK1* mRNA levels were determined as described in Fig. 4B. The 0 h normalized value of *SOK1/ACT1* for the WT was set to be 1.00.

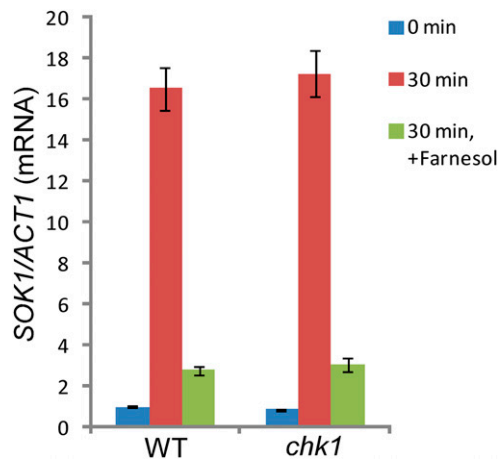

**Fig. 53.** Deletion of *CHK1* has no effect on *SOK1* expression. Quantitative RT-PCR analysis of *SOK1* expression in WT or *chk1* mutant. Cells were diluted into prewarmed YPD medium at 37 °C in the presence or absence of 100  $\mu$ M farnesol. *SOK1* mRNA levels were determined as described in Fig. 4B. The 0 h normalized value of *SOK1/ACT1* for the WT was set to be 1.00.

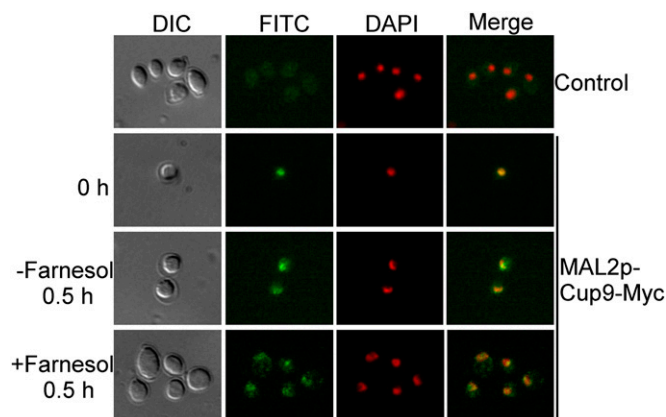

**Fig. 54.** Cup9 is constitutively localized in the nucleus. WT strain expressing Cup9-Myc under the *MAL2* promoter was grown in YPD medium at 37 °C in the presence or absence of 100  $\mu$ M farnesol. Cells were fixed and processed for indirect immunofluorescence as described (1) with 9E10 mouse antibodies and FITC-conjugated secondary antibodies. DNA was stained with DAPI. An untagged control (SC5314) was included.

1. Wang A, et al. (2007) Temporal and spatial control of *HGC1* expression results in Hgc1 localization to the apical cells of hyphae in *Candida albicans*. *Eukaryot Cell* 6(2):253–261.

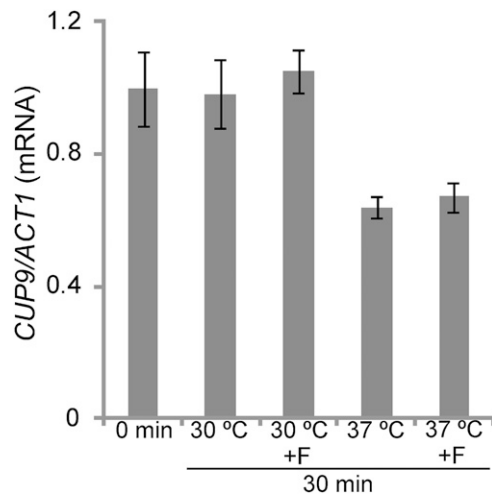

**Fig. 55.** Farnesol does not regulate the expression levels of *CUP9*. Quantitative RT-PCR analysis of *CUP9* expression in WT cells under the same growth condition as described in Fig. 4C. F, farnesol.

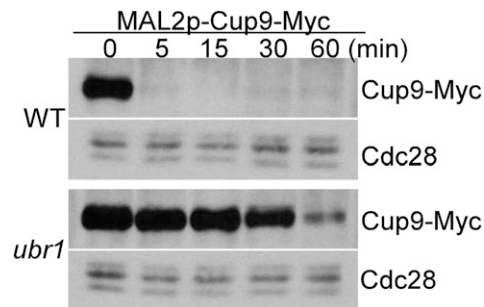

**Fig. 56.** Cup9 is degraded rapidly by Ubr1 in response to release from farnesol inhibition. WT and *ubr1* mutant cells carrying Cup9-Myc under the *MAL2* promoter were grown in yeast extract-peptone plus 2% maltose medium overnight; 2% glucose was added into the overnight cultures to shut off the promoter for 20 min. The overnight cultures were then inoculated into fresh YPD media at 30 °C. The protein degradation of Cup9 was assessed as described in Fig. 5A.

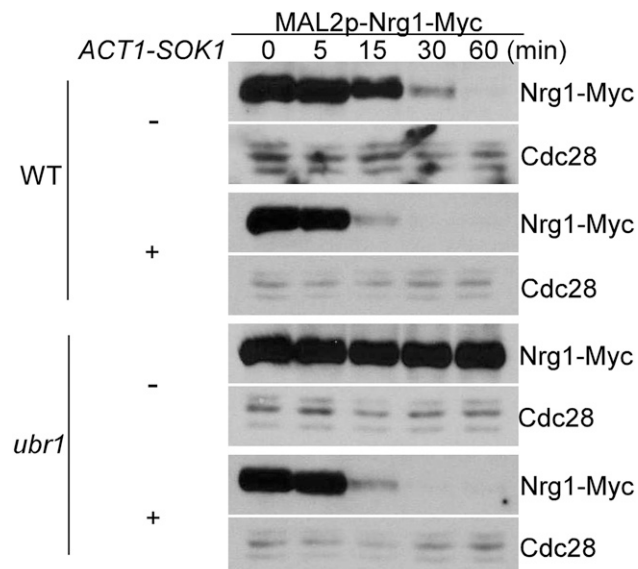

**Fig. 57.** Ubr1 is not directly responsible for the degradation of Nrg1. A Western blot of WT and *ubr1* mutant cells carrying Cup9-Myc under the *MAL2* promoter with or without *ACT1* promoter-driven *SOK1* inoculated from overnight cultures into fresh YPD media at 30 °C.

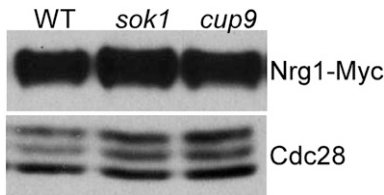

Fig. S8. There is no dramatic change in Nrg1 protein level in overnight culture of *sok1* or *cup9* mutant compared with that in WT cells.

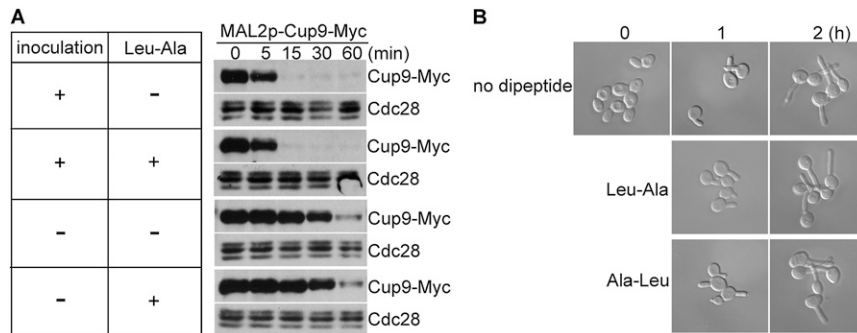

Fig. S9. Dipeptides have no effect on Cup9 degradation and germ-tube formation in *C. albicans*. (A) Cup9 stability is monitored by *MAL2* promoter shutdown. For the experiments with inoculation, WT cells carrying Cup9-Myc under the *MAL2* promoter were inoculated from overnight culture into fresh minimal medium of 2% glucose, 0.5% allantoin, and 0.17% yeast nitrogen base (YNB) at 30 °C with or without 10 mM Leu-Ala. For the experiments without inoculation, WT cells containing Cup9-Myc under the *MAL2* promoter were grown in minimal medium of 2% maltose, 0.5% allantoin, and 0.17% YNB with or without 10 mM Leu-Ala for 4 h to induce the expression of Cup9-Myc at 30 °C. Glucose (2%) was added to shut off the promoter. (B) Overnight culture of WT cells was diluted into fresh buffered minimal medium of 2% glucose, 0.5% allantoin, and 0.17% YNB (pH 7) with or without indicated dipeptides (10 mM) at 37 °C for cell morphology analysis.

Table S1. *C. albicans* strains used in this study

| Strain   | Parent/ background | Genotype                                                                                                  | Source     |
|----------|--------------------|-----------------------------------------------------------------------------------------------------------|------------|
| SC5314   |                    | WT                                                                                                        | 1          |
| CAI4     | SC5314             | <i>ura3::1 imm434/lura3::1 imm434</i>                                                                     | 1          |
| BWP17    | SC5314             | <i>ura3::1 imm434/lura3::1 imm434 his1::hisG/his1::hisG arg4::hisG/larg4::hisG</i>                        | 2          |
| HLY3922  | CAI4               | <i>ura3::1 imm434/lura3::1 imm434 NRG1/NRG1-13MYC-URA3</i>                                                | 3          |
| CR276    | CAI4               | <i>ura3::1 imm434/lura3::1 imm434 cyr1::hisG/cyr1::hisG</i>                                               | 4          |
| AS1      | CAI4               | <i>ura3::1 imm434/lura3::1 imm434 tpk2::hisG/tpk2::hisG</i>                                               | 5          |
| HLY 4031 | CAI4               | <i>ura3::1 imm434/lura3::1 imm434 ADE2/lade2::MAL2p-NRG1-13MYC-URA3</i>                                   | 3          |
| HLY4178  | CAI4               | <i>ura3::1 imm434/lura3::1 imm434 SOK1/SOK1-13MYC-URA3</i>                                                | This study |
| HLY4179  | CAI4               | <i>ura3::1 imm434/lura3::1 imm434 CUP9/CUP9-13MYC-URA3</i>                                                | This study |
| HLY4080  | BWP17              | <i>ubr1::ARG4/lubr1::HIS1 ura3::1 imm434/lura3::1 imm434 his1::hisG/his1::hisG arg4::hisG/larg4::hisG</i> | This study |
| HLY4278  | CAI4               | <i>ura3::1 imm434/lura3::1 imm434 ADE2/lade2::MAL2p-MGT1-13MYC-URA3</i>                                   | This study |
| HLY4279  | HLY4031            | <i>ura3::1 imm434/lura3::1 imm434 ADE2/lade2::MAL2p-NRG1-13MYC-URA3 RP10::ACT1p-SOK1-13MYC-SAT1</i>       | This study |

- Fonzi WA, Irwin MY (1993) Isogenic strain construction and gene mapping in *Candida albicans*. *Genetics* 134(3):717–728.
- Wilson RB, Davis D, Mitchell AP (1999) Rapid hypothesis testing with *Candida albicans* through gene disruption with short homology regions. *J Bacteriol* 181(6):1868–1874.
- Lu Y, Su C, Wang A, Liu H (2011) Hyphal development in *Candida albicans* requires two temporally linked changes in promoter chromatin for initiation and maintenance. *PLoS Biol* 9(7):e1001105.
- Rocha CR, et al. (2001) Signaling through adenyl cyclase is essential for hyphal growth and virulence in the pathogenic fungus *Candida albicans*. *Mol Biol Cell* 12(11):3631–3643.
- Sonneborn A, et al. (2000) Protein kinase A encoded by *TPK2* regulates dimorphism of *Candida albicans*. *Mol Microbiol* 35(2):386–396.

**Table S2. Primers used in this study**

| Primer | Sequence                                      | Purpose and feature |
|--------|-----------------------------------------------|---------------------|
| 1      | 5'- <u>CGGGATCC</u> CAAGTCATTTTATCCTCATC      | pPR673-SOK1         |
| 2      | 5'-GGCG <u>ACGCGT</u> CGTGATAACATACTTAATGGGGC |                     |
| 3      | 5'-CTGTCTAGAA <u>TGACTT</u> CAACAAATGGACA     | pMAL2-SOK1-MYC      |
| 4      | 5'-CTG <u>ACGCGT</u> TGATAACATACTTAATGGGGC    |                     |
| 5      | 5'- <u>CGGGATCC</u> CTCTGGTAATGCTCCATTGC      | pPR673-CUP9         |
| 6      | 5'-GGCG <u>ACGCGT</u> CGAAAGTTCAAACGCTGTTGTTG |                     |
| 7      | 5'-CTGTCTAGAA <u>TGAAGT</u> TAGATCAATTAATTA   | pMAL2-CUP9-MYC      |
| 8      | 5'-CTG <u>ACGCGT</u> AAAGTTCAAACGCTGTTGTTG    |                     |
| 9      | 5'-CTAGGGCCCTAGTGCTCACTATACTTG                | pSF52-NRG1          |
| 10     | 5'-GTACTCGAGCTTAATGAACTAGCAGG                 |                     |
| 11     | 5'-ATAAGAATGCGGCCGCCCTAGTATAGATGTGGTC         |                     |
| 12     | 5'-TCCCGCGGGATCTATGGCAATGCAAG                 |                     |
| 13     | 5'-CTGTCTAGAA <u>TGCTA</u> ACCTATATTACTG      | pMAL2-MGT1-MYC      |
| 14     | 5'-CTG <u>ACGCGT</u> AAATACCTATACCTTCCTGCTTC  |                     |
| 15     | 5'-CGGGATCCCATGACTTCAACAAATGGACA              | pPR671-SOK1-SAT1    |
| 16     | 5'-GGCG <u>ACGCGT</u> CGTGATAACATACTTAATGGGGC |                     |

Restriction sites are underlined.
